# Supplementary material
Source: PubMed Central journal article supplement (PMC1087177)
Supplement: JCI0524066sd.pdf [file JCI0524066sd.pdf]

# Supplementary Figures

Fig 1

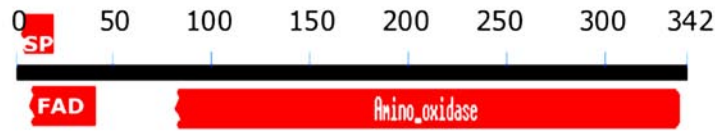

Fig 2

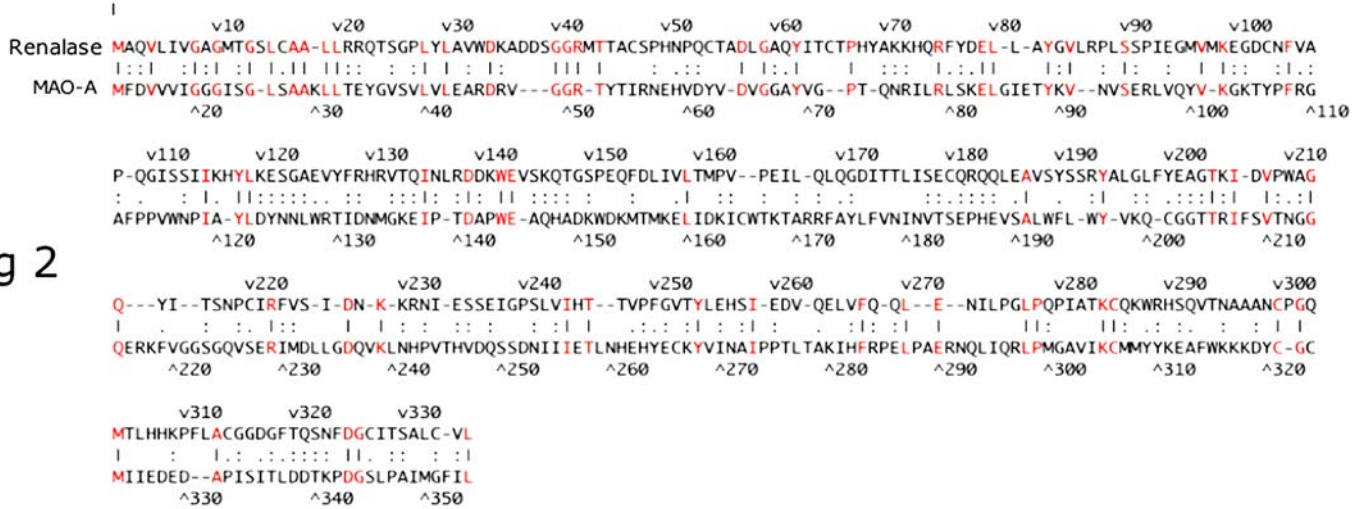

## SUPPLEMENTARY FIGURE LEGENDS

Figure 1

Nucleotide and deduced amino acid sequence (triple letter code) of human renalase and comparison with MAO-A.

Figure 2

Putative structural motifs detected in renalase: FAD: flavin adenine dinucleotide, SP: signal peptide.
